# Supplementary material for: Heat shock protein 90 inhibitors augment endogenous wild-type p53 expression but down-regulate the adenovirally-induced expression by inhibiting a proteasome activity
Source: Oncotarget. 2018 May 25;9(40):26130–43. doi: 10.18632/oncotarget.25452 (PMC5995238; doi:10.18632/oncotarget.25452)
Supplement: Supplementary file 1 [file oncotarget-09-26130-s001.pdf]

## Heat shock protein 90 inhibitors augment endogenous wild-type p53 expression but down-regulate the adenovirally-induced expression by inhibiting a proteasome activity

### SUPPLEMENTARY MATERIALS

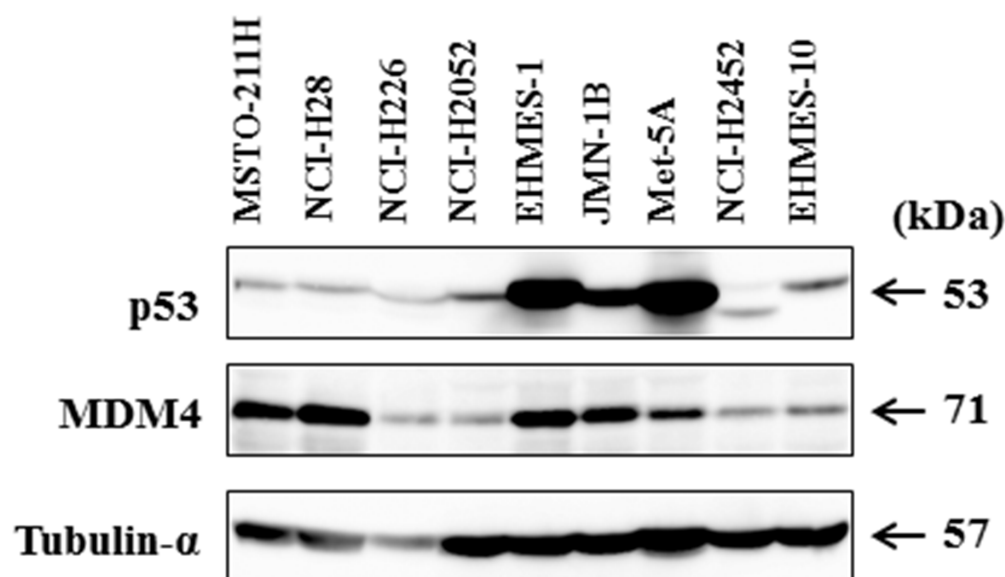

**Supplementary Figure 1: Expression of p53 and MDM4 in mesothelioma examined with Western blot analysis.** NCI-H2452 cells had truncated p53 protein and tubulin- $\alpha$  was used as a loading control.

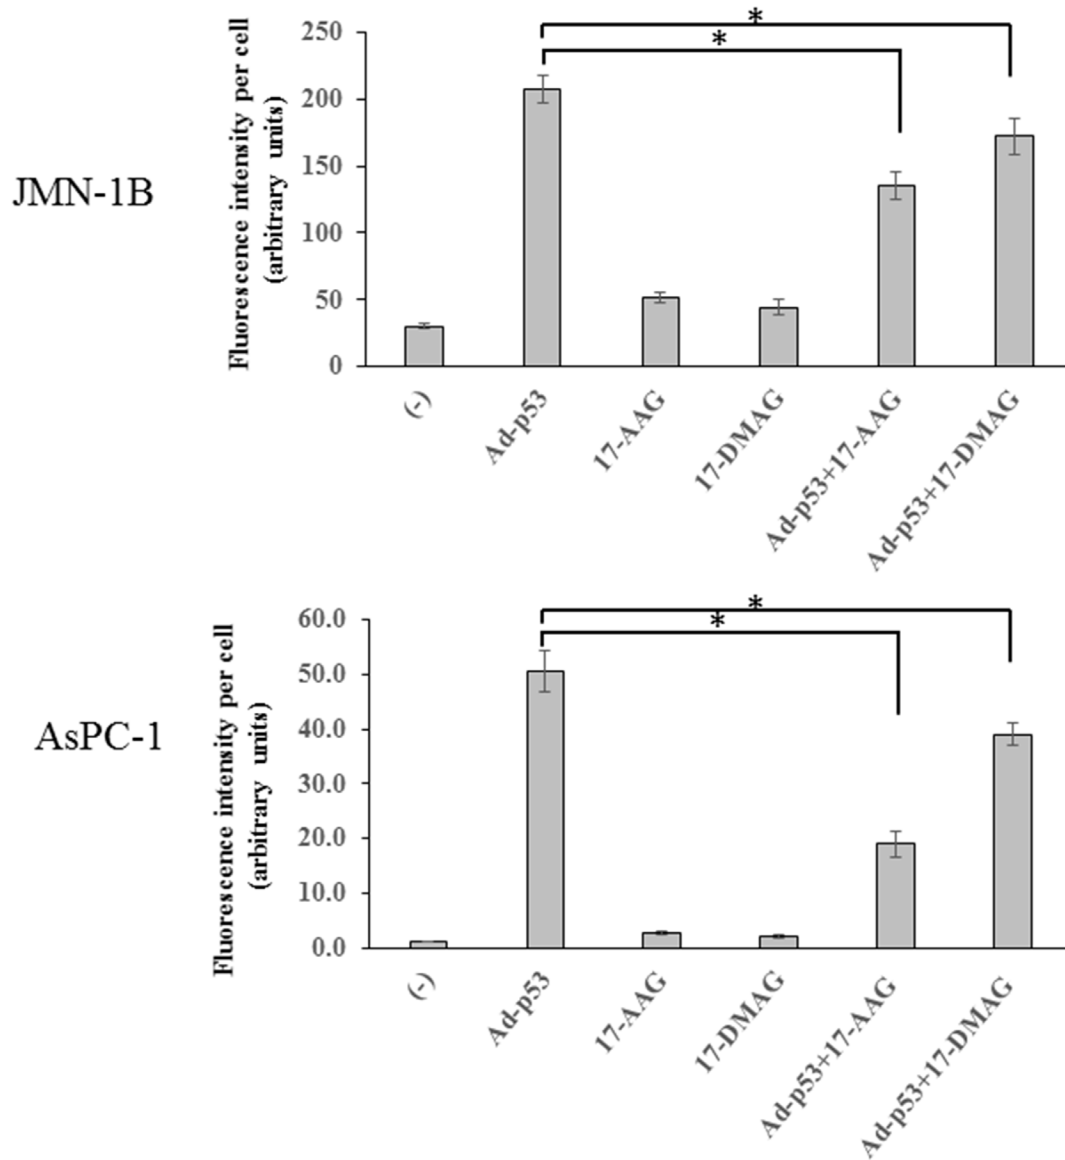

**Supplementary Figure 2: HSP90 inhibitors decreased Ad-p53-induced p53 fluorescence intensity.** JMN-1B or AsPC-1 cells treated with 17-AAG (1  $\mu$ M) or 17-DMAG (0.1  $\mu$ M), or with Ad-p53 ( $3 \times 10^4$  vp/cell) together with 17-AAG (1  $\mu$ M) or 17-DMAG (0.1  $\mu$ M), were stained with anti-p53Ab, DO-1 as shown in Figure 2C and 2F. The p53 fluorescence intensity of cells in a certain area after subtraction of the background (the size same area without stained cells) was measured with ImageJ software (National Institute of Health, Bethesda, MD, USA, available at <https://imagej.nih.gov/ij/index.html>) and the intensity per cell was expressed as an arbitrary unit. \* $P < 0.01$  ( $n = 6$ , numbers of measured area).

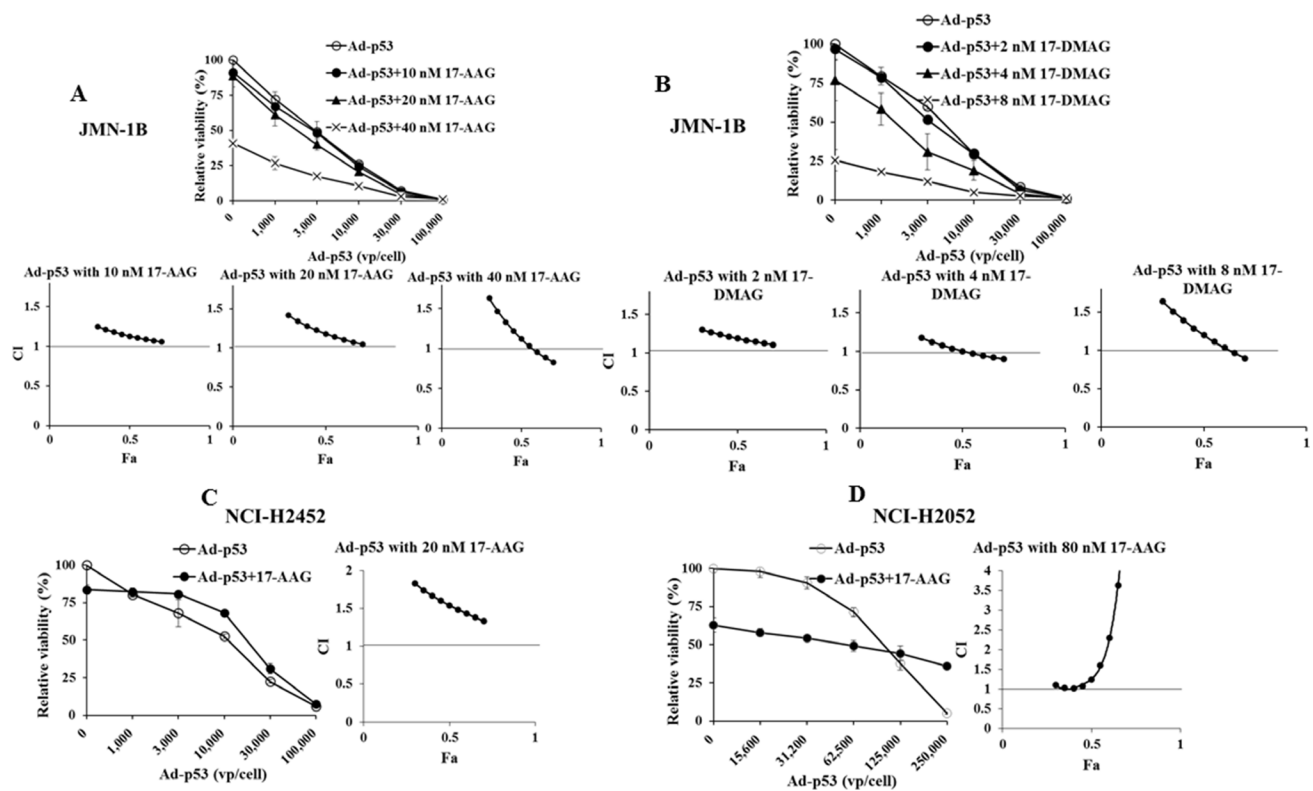

**Supplementary Figure 3: Combinatory effects of Ad-p53 and HSP90 inhibitors.** (A, B) JM1-1B, (C) NCI-H2452 and (D) NCI-H2052 cells were infected with Ad-p53 as indicated and treated with 17-AAG or 17-DMAG for 96 hours. Relative viability of cells was examined with the WST assay. The average with SE bars ( $n = 3$ ) and CI values at Fa points between 0.3 and 0.7 are shown.

## JMN-1B

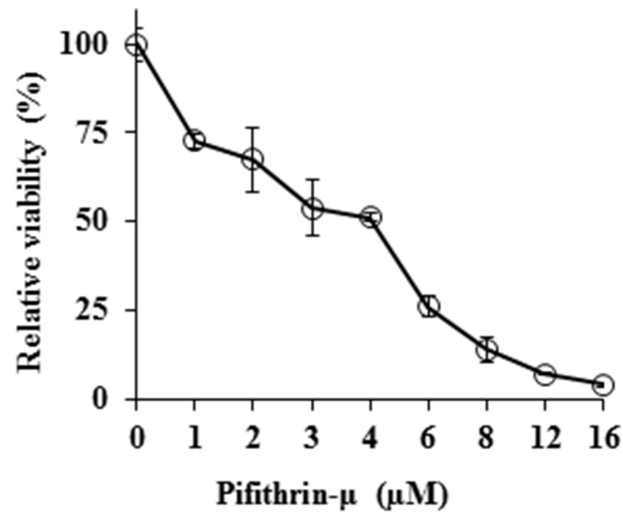

**Supplementary Figure 4: Cytotoxicity of PFT-μ.** JMN-1B cells were treated with various concentrations of PFT-μ and the cytotoxicity was examined with the WST assay. The average with SE bars ( $n = 3$ ) are shown.

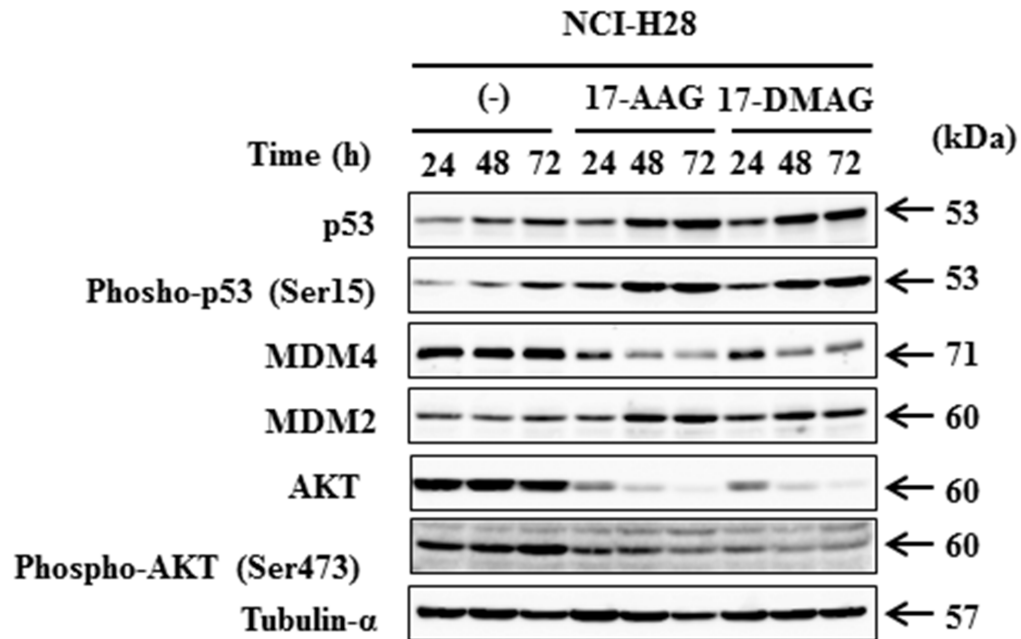

**Supplementary Figure 5: Down-regulated expression of MDM4 with HSP90 inhibitors.** NCI-H28 cells with wild-type *p53* genotype were treated with 17-AAG (0.3 μM) or 17-DMAG (0.1 μM) as indicated. Cell lysates were subjected to Western blot analysis. Tubulin-α was used as loading control.

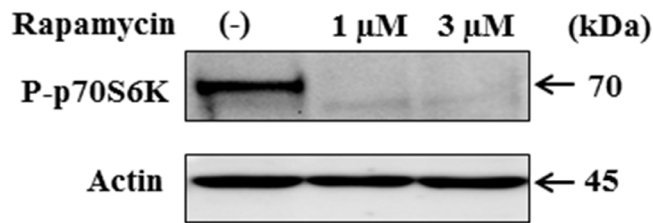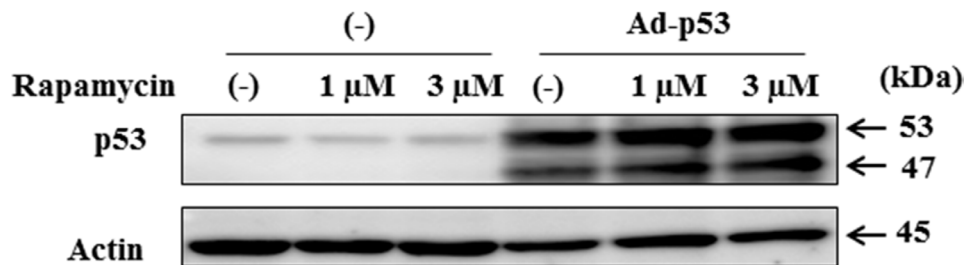

**Supplementary Figure 6: A mTOR inhibitor did not influence HSP90 inhibitors-mediated p53 suppression.** JMN-1B cells were uninfected or infected with Ad-p53 ( $3 \times 10^4$  vp/cell) and treated with rapamycin (1 or 3  $\mu$ M) for 48 hours, and the cell lysate were subjected to Western blot analysis. Actin was used as a loading control.

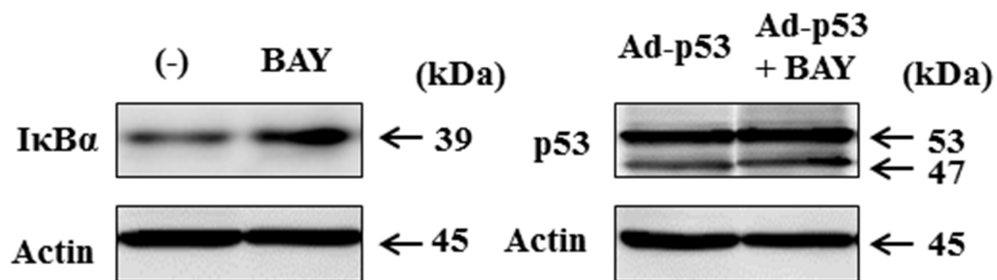

**Supplementary Figure 7: Influence of the NF- $\kappa$ B pathway on p53 expression induced by Ad-p53.** JMN-1B cells were treated with BAY 11-7082 (20  $\mu$ M), an NF- $\kappa$ B inhibitor, and with Ad-p53 ( $3 \times 10^4$  vp/cell) for 48 hours. Cell lysates were subjected to Western blot analysis. Actin was used as loading control.

Supplementary Table 2: Cell cycle progression in MSTO-211H cells treated with HSP90 inhibitors

| Cell cycle distribution (%) |      |              |              |              |              |
|-----------------------------|------|--------------|--------------|--------------|--------------|
| Agent                       | Time | Sub-G1       | G0/G1        | S            | G2/M         |
| (-)                         | 24   | 1.45 ± 0.05  | 62.18 ± 0.28 | 12.79 ± 0.19 | 23.97 ± 0.41 |
| (-)                         | 48   | 1.15 ± 0.07  | 67.26 ± 0.13 | 11.45 ± 0.24 | 20.46 ± 0.22 |
| (-)                         | 72   | 0.78 ± 0.05  | 72.28 ± 0.13 | 9.10 ± 0.24  | 18.09 ± 0.32 |
| 17-AAG                      | 24   | 15.42 ± 0.32 | 42.45 ± 0.24 | 2.86 ± 0.06  | 39.64 ± 0.47 |
| 17-AAG                      | 48   | 32.08 ± 0.55 | 36.18 ± 0.18 | 4.49 ± 0.14  | 27.38 ± 0.37 |
| 17-AAG                      | 72   | 43.66 ± 0.96 | 31.42 ± 0.25 | 5.26 ± 0.18  | 19.78 ± 0.60 |
| 17-DMAG                     | 24   | 10.27 ± 0.16 | 44.32 ± 0.45 | 2.37 ± 0.13  | 42.99 ± 0.41 |
| 17-DMAG                     | 48   | 28.83 ± 0.37 | 35.62 ± 0.05 | 3.51 ± 0.06  | 32.10 ± 0.31 |
| 17-DMAG                     | 72   | 46.67 ± 0.45 | 29.49 ± 0.27 | 5.32 ± 0.07  | 18.67 ± 0.55 |

MSTO-211H cells were treated with 17-AAG (2 µM) or 17-DMAG (1 µM) for 24, 48 or 72 hours. Data showed the average and SEs ( $n = 3$ ).

Supplementary Table 3: Cell cycle progression in JMN-1B cells infected with Ad vector and/or the HSP90 inhibitors

| Treatment |           | Cell cycle distribution (%) |              |              |                           |
|-----------|-----------|-----------------------------|--------------|--------------|---------------------------|
| Ad vector | Inhibitor | Sub-G1                      | G0/G1        | S            | G2/M                      |
| (-)       | (-)       | 1.74 ± 0.08                 | 69.61 ± 0.20 | 13.84 ± 0.24 | 15.23 ± 0.10 <sup>a</sup> |
| (-)       | 17-AAG    | 4.09 ± 0.20                 | 37.62 ± 0.51 | 11.93 ± 0.23 | 46.90 ± 0.53 <sup>a</sup> |
| (-)       | 17-DMAG   | 4.11 ± 0.09                 | 30.70 ± 0.17 | 18.80 ± 0.27 | 47.03 ± 0.42 <sup>a</sup> |
| Ad-LacZ   | (-)       | 1.47 ± 0.01                 | 70.45 ± 0.31 | 13.23 ± 0.17 | 15.12 ± 0.45              |
| Ad-p53    | (-)       | 42.01 ± 0.40 <sup>b</sup>   | 35.86 ± 0.24 | 14.98 ± 0.28 | 7.98 ± 0.10               |
| Ad-LacZ   | 17-AAG    | 4.46 ± 0.02                 | 36.91 ± 0.20 | 9.75 ± 0.15  | 49.33 ± 0.15              |
| Ad-LacZ   | 17-DMAG   | 4.22 ± 0.20                 | 29.75 ± 0.15 | 18.07 ± 0.18 | 48.43 ± 0.47              |
| Ad-p53    | 17-AAG    | 10.54 ± 0.40 <sup>b</sup>   | 32.06 ± 0.33 | 9.35 ± 0.06  | 48.45 ± 0.48              |
| Ad-p53    | 17-DMAG   | 9.83 ± 0.12 <sup>b</sup>    | 34.55 ± 0.16 | 9.55 ± 0.06  | 46.53 ± 0.25              |

JMN-1B cells were treated with either 17-AAG (1 µM) or 17-DMAG (0.1 µM) and/or infected with Ad-p53 or Ad-LacZ ( $3 \times 10^4$  vp/cell) and cell cycle profiles at 48 hours were analyzed with flow cytometry. Data showed the average and SEs ( $n = 3$ ).

<sup>a</sup> $P < 0.01$ , comparing between cells treated with HSP90 inhibitors and untreated cells.

<sup>b</sup> $P < 0.01$ , comparing between cells treated with combination of HSP90 inhibitors and Ad-p53 and those treated with Ad-p53 alone.
